# Supplementary material
Source: PubMed Central journal article supplement (PMC2992264)
Supplement: supp_M110.137539_jbc.M110.137539-1.pdf [file supp_M110.137539_jbc.M110.137539-1.pdf]

## SUPPLEMENTAL DATA

(1) Synthesis of non-labeled derivative: Archazolid A (20 mg, 28  $\mu\text{mol}$ ), DMAP (7.1 mg, 58  $\mu\text{mol}$ , 2.1 eq.) and EDC (11.1 mg, 58.0  $\mu\text{mol}$ , 2.1 eq.) were exhibited under argon atmosphere. Then a solution of 4-(3-(trifluoromethyl)-3*H*-diazirin-3-yl)benzoic acid (9.5 mg, 41.4  $\mu\text{mol}$ , 1.5 eq.) in  $\text{CH}_2\text{Cl}_2$  (1 mL) was added and the resulting mixture was stirred for 18 h under light exclusion. The solvent was removed and the residue was purified by preparative TLC (EtOAc / hexanes = 1:2) to give the di-ester BD-archazolid (3.5 mg, 3.0  $\mu\text{mol}$ , 11 %). 5 mg of archazolid A could be recovered.  $^1\text{H}$  NMR (600 MHz,  $\text{CD}_3\text{OD}$ , BD-archazolid)  $\delta$  = 0.97 (d,  $J$  = 7.0 Hz, 3 H), 1.01 (d,  $J$  = 7.0 Hz, 3 H), 1.02 (d,  $J$  = 7.0 Hz, 3 H), 1.07 (d,  $J$  = 7.0 Hz, 3 H), 1.12 (d,  $J$  = 7.0 Hz, 3 H), 1.35 (m, 1 H), 1.64 (s, 3 H), 1.65 (s, 3 H), 1.74 (m, 1H), 1.81 (m, 1 H), 1.84 (dd,  $J$  = 8.1 Hz,  $J$  = 4.7 Hz, 1 H), 1.89 (s, 3 H), 1.91 (s, 3 H), 1.95 (s, 3 H), 2.67 (m, 1 H), 2.75 (s, 3 H), 3.01 (d,  $J$  = 7.3 Hz, 1 H), 3.08 (dd,  $J$  = 13.6 Hz,  $J$  = 6.7 Hz, 1 H), 3.11 (s, 3 H), 3.23 (d,  $J$  = 9.2 Hz, 1 H), 5.25 (d,  $J$  = 9.9 Hz, 1 H), 5.31 (d,  $J$  = 9.5 Hz, 1 H), 5.53 (d,  $J$  = 12.5 Hz, 1 H), 5.54 (t,  $J$  = 9.9 Hz, 1 H), 5.80 (dd,  $J$  = 7.7,  $J$  = 3.7 Hz, 1 H), 5.89 (d,  $J$  = 8.1 Hz, 1 H), 5.90 (d,  $J$  = 8.1 Hz, 1 H), 6.00 (d,  $J$  = 5.1 Hz, 1 H), 6.03 (dd,  $J$  = 9.0 Hz,  $J$  = 4.6 Hz, 1 H), 6.09 (dd,  $J$  = 15.0 Hz,  $J$  = 10.6 Hz, 1 H), 6.61 (d,  $J$  = 15.7 Hz, 1 H), 6.84 (t,  $J$  = 7.0 Hz, 1 H), 7.17 (s, 1 H), 7.37 (d,  $J$  = 7.8 Hz, 2 H), 7.38 (d,  $J$  = 7.9 Hz, 2 H), 8.07 (d,  $J$  = 8.4 Hz, 2 H), 8.11 (d,  $J$  = 8.44 Hz, 1 H);  $^{13}\text{C}$  NMR (100 MHz,  $\text{CD}_3\text{OD}$ , BD-archazolid)  $\delta$  = 12.4, 12.6, 17.0, 17.3, 18.0, 19.8, 22.3, 23.4, 24.3, 25.8, 27.5, 30.8, 39.8, 40.5, 42.6, 44.9, 46.0, 56.3, 73.3, 77.1, 77.5, 79.1, 88.5, 117.0, 125.5, 127.7, 127.7, 128.2, 129.3, 130.0, 131.1, 131.3, 132.0, 133.3, 133.3, 133.6, 134.7, 135.2, 135.7, 136.3, 141.2, 141.7, 156.0, 166.0, 166.2, 168.4, 174.0; HRMS: calculated for  $\text{C}_{60}\text{H}_{68}\text{F}_6\text{N}_6\text{O}_9\text{SNa}$ : 1185.4570, found: 1185.4752.

(2) Synthesis of labeled derivative: Archazolid A (20 mg, 28  $\mu\text{mol}$ ), DMAP (7.1 mg, 58  $\mu\text{mol}$ , 2.1 eq.) and EDC (11.1 mg, 58.0  $\mu\text{mol}$ , 2.1 eq.) were exhibited under argon atmosphere. Then a solution of  $^{14}\text{C}$  labeled 4-(3-(trifluoromethyl)-3*H*-diazirin-3-yl)benzoic acid (9.5 mg, 41.4  $\mu\text{mol}$ , 1.5 eq.) (Ref. 23) in  $\text{CH}_2\text{Cl}_2$  (1 ml) was added and the resulting mixture was stirred for 18 h under light exclusion. The solvent was evaporated and the residue was purified by column chromatography on silica gel (EtOAc / hexanes = 1:2) to give 1.8 mg (1.5  $\mu\text{mol}$ , 5 %) of the di-ester BD-archazolid. The spectroscopical data was identical to that for the non labeled compound. The only difference is, that the signal for the  $^{14}\text{C}$ -Carbon atom is missing in the  $^{13}\text{C}$  NMR Spektra (BD-archazolid: 166.0, 166.2).
